# Supplementary material
Source: HighWire-hosted journal article supplement (https://jitc.bmj.com/content/8/1/e000131)

Fig. S1

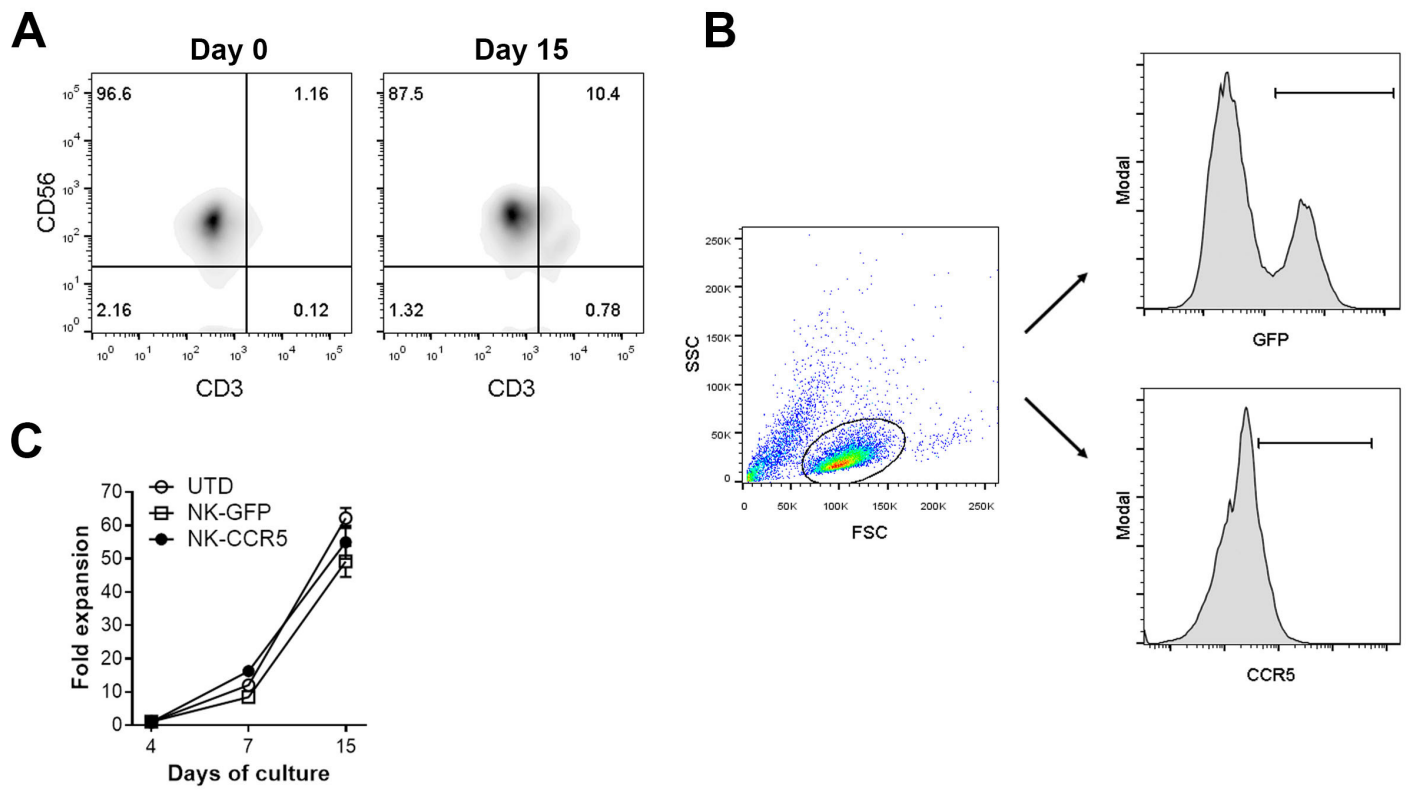

Supplement: inline-supplementary-material-1 [file inline-supplementary-material-1.pdf]

Fig. S2

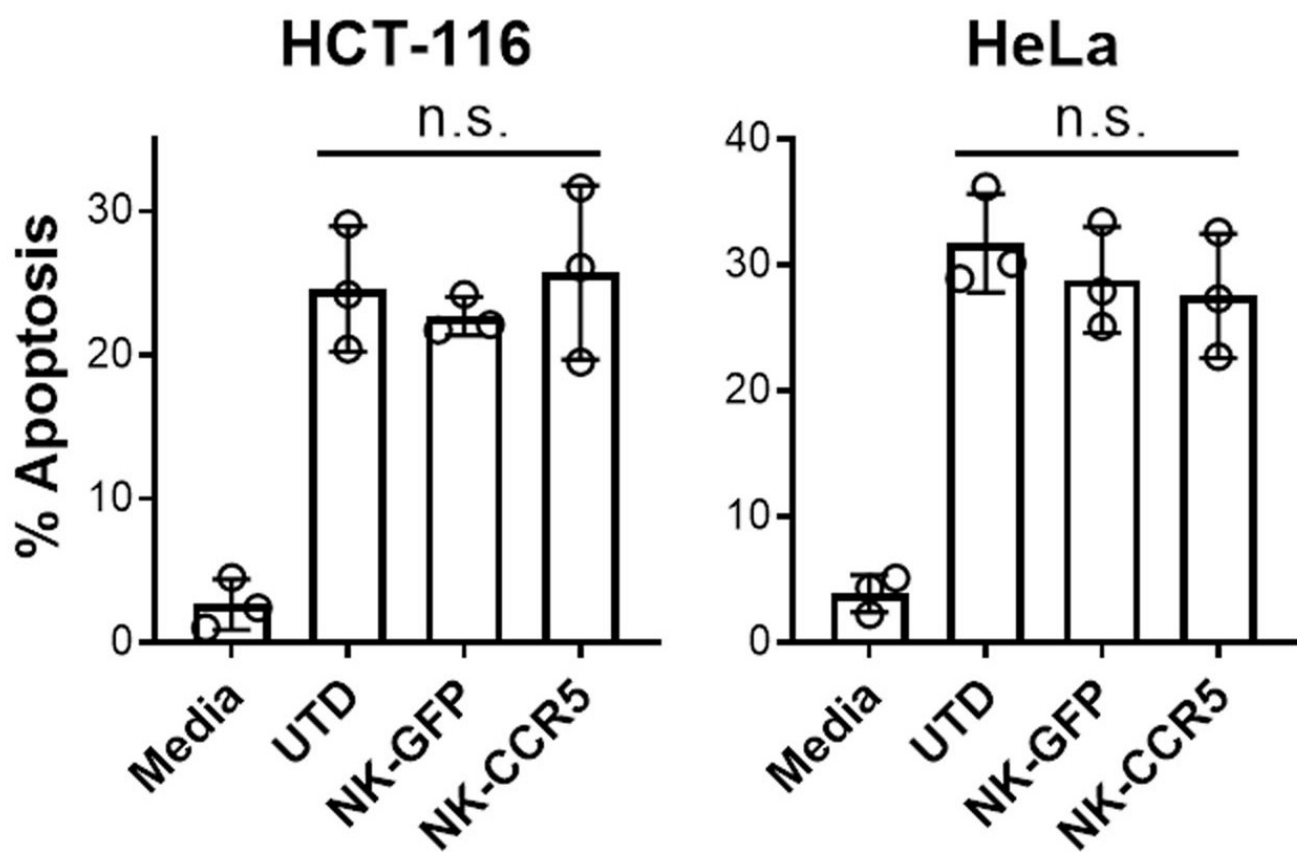

Supplement: inline-supplementary-material-2 [file inline-supplementary-material-2.pdf]

**Fig. S3**

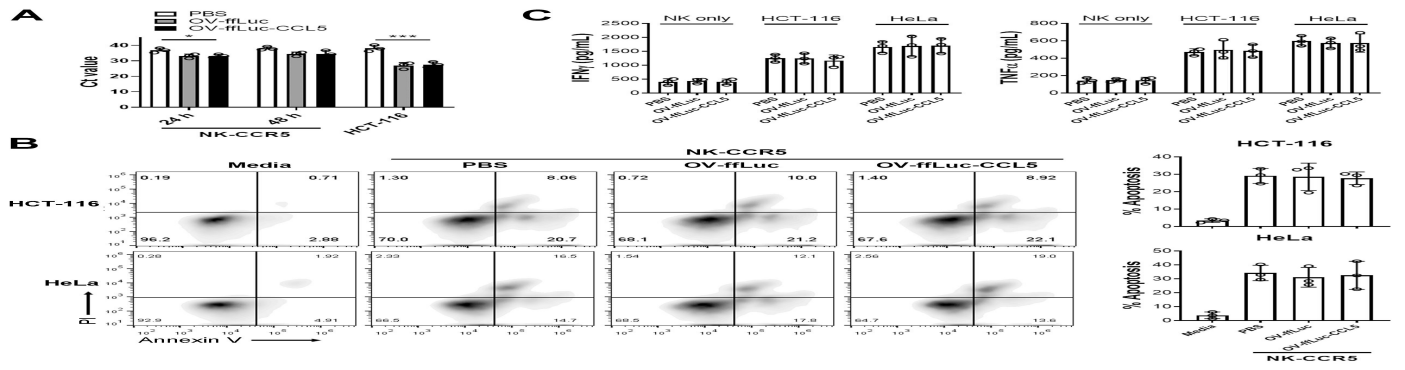

Supplement: inline-supplementary-material-3 [file inline-supplementary-material-3.pdf]

Fig. S4

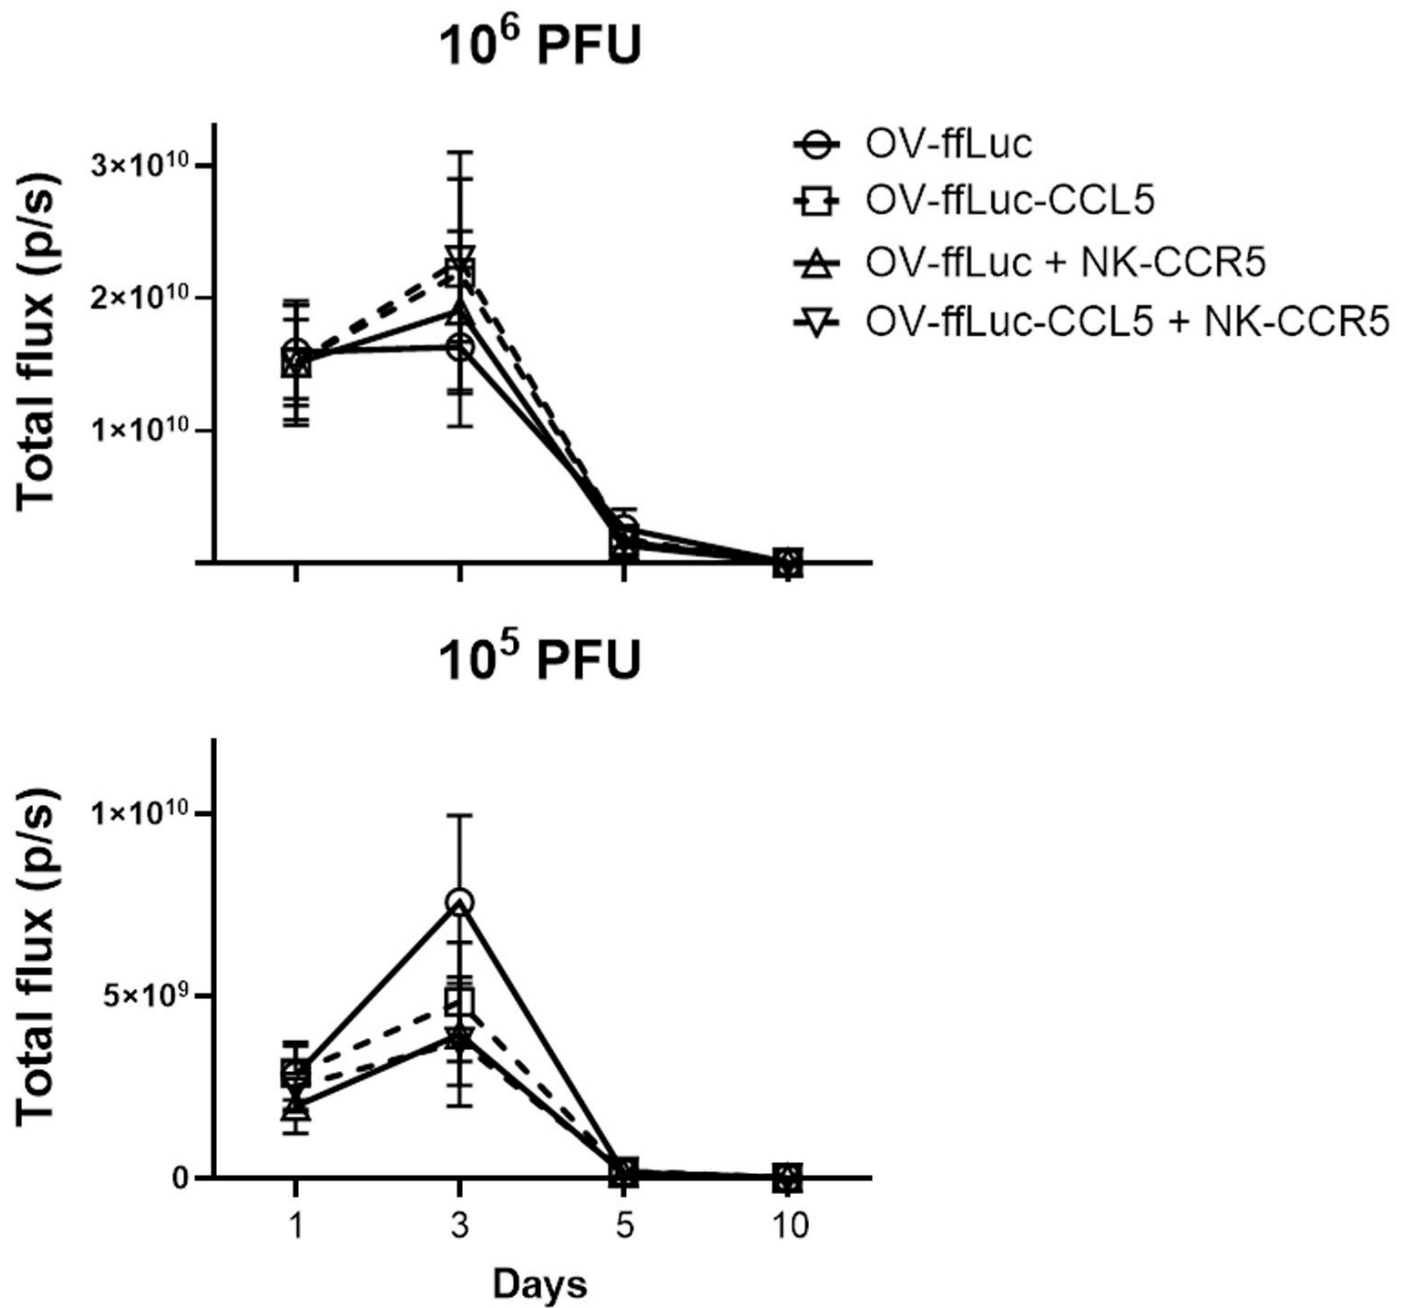

Supplement: inline-supplementary-material-4 [file inline-supplementary-material-4.pdf]

Fig. S5

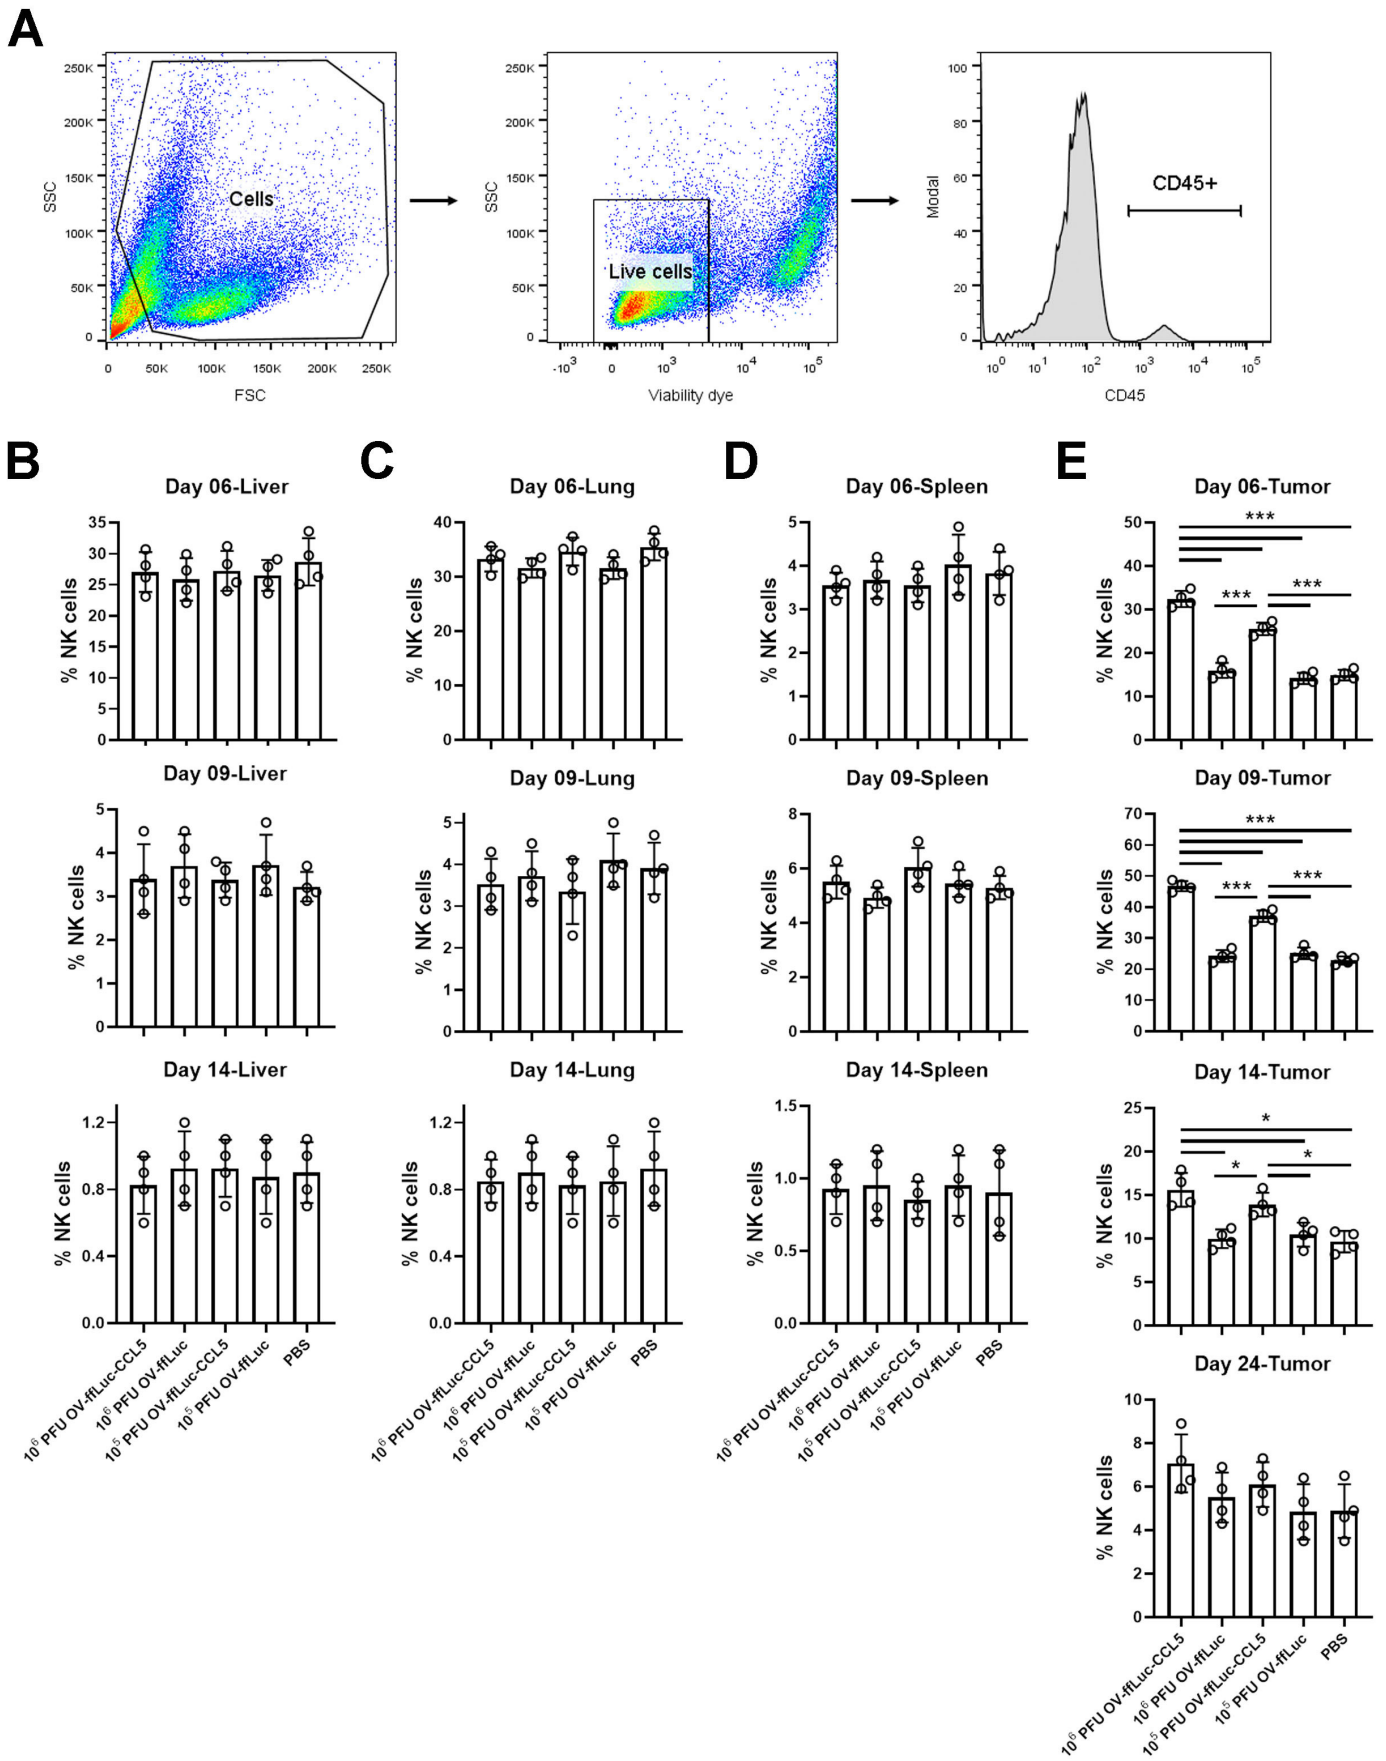

Supplement: inline-supplementary-material-5 [file inline-supplementary-material-5.pdf]

Fig. S6

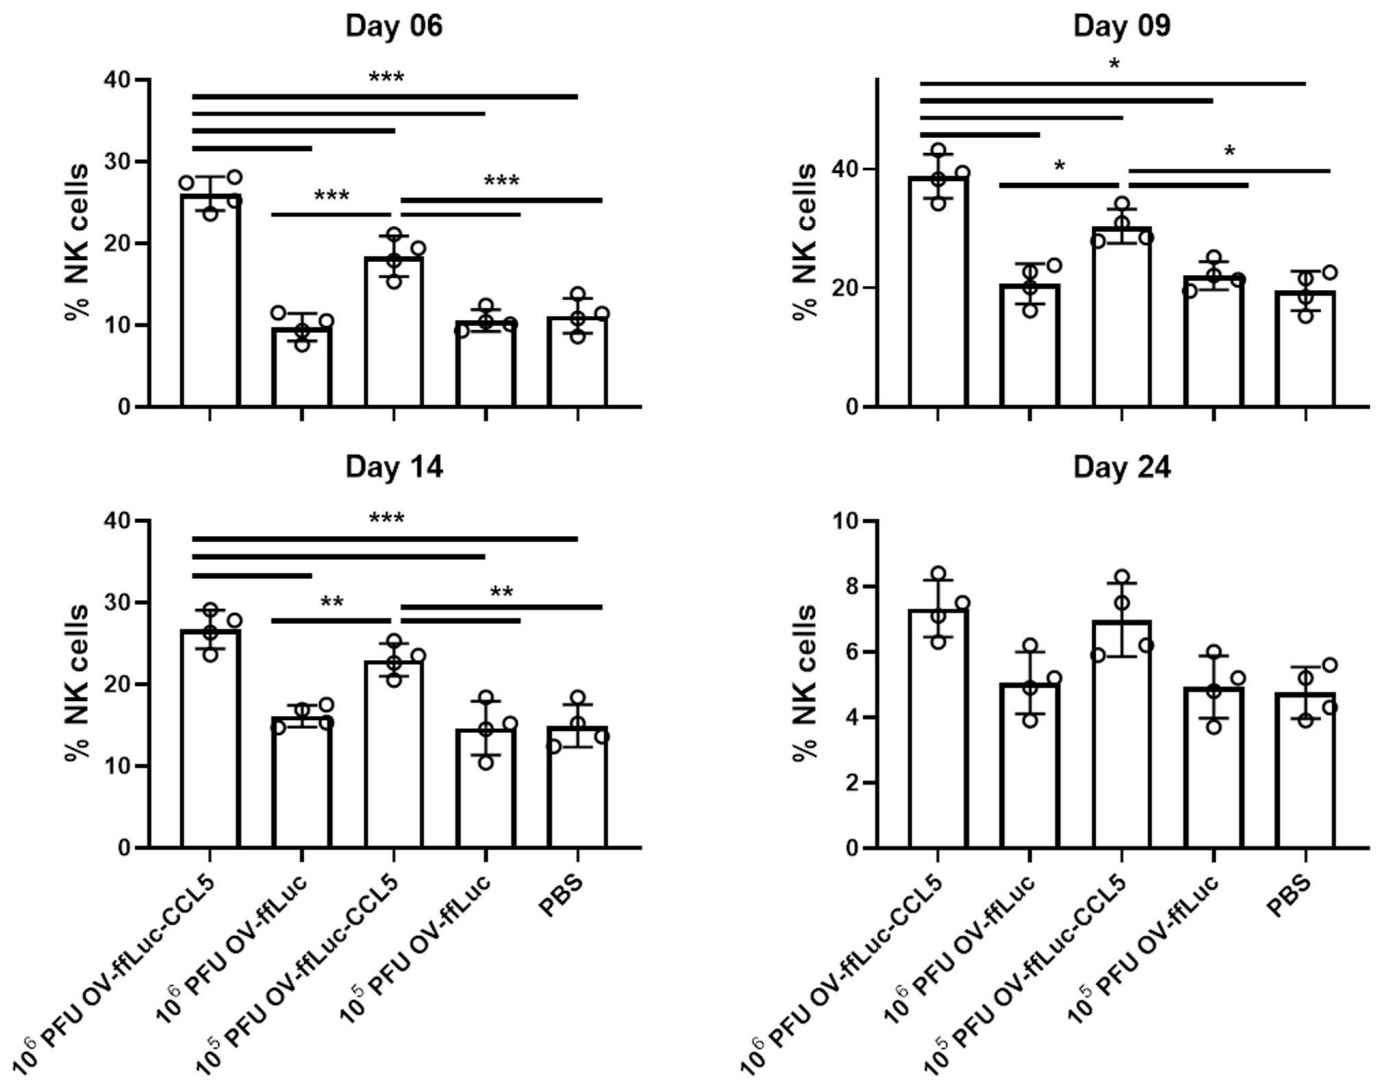

Supplement: inline-supplementary-material-6 [file inline-supplementary-material-6.pdf]
